# Supplementary material for: Stem Cell-Derived Extracellular Vesicles in the Treatment of Cardiovascular Diseases
Source: MDPI journal article supplement (doi:10.3390/pharmaceutics16030381), 2024-03-11
Supplement: s1 [file s1]

## Supplementary information

### Isolation of extracellular vesicles

The following generic protocol for purification of extracellular vesicles has been originally described by Théry et al. [47].

#### Step 1. Primary centrifugation

Collect cells by centrifugation in medium relevant to the cells of interest at 300 g for 10 minutes at 4°C. Collect supernatant and subject it to step 2.

#### Step 2. Secondary centrifugation

Centrifuge supernatant from step 1 at 2,000 g for 10 minutes at 4°C. Collect supernatant and subject it to step 3.

#### Step 3. Intermediate centrifugation

Centrifuge supernatant from step 2 at 10,000 g for 30 minutes at 4°C. For purification of small extracellular vesicles, collect supernatant and subject it to step 4. For isolation of microvesicles collect the pellet from this step.

#### Step 4. Primary ultracentrifugation

Centrifuge supernatant from step 3 at 100,000 g for 70 minutes at 4°C using an ultracentrifuge, collecting small EVs, including exosomes, in the pellet.

#### Step 5. Pellet Resuspension

Discard supernatant from step 4 and resuspend in 1x PBS or 1x TBS the pellet that contains EVs along with contaminating proteins. Proceed to step 6.

#### Step 6. Secondary ultracentrifugation

Perform ultracentrifugation of the resuspended fraction from step 5 at 100,000 g for 70 minutes at 4°C to wash the small EVs/exosomes. Discard supernatant and resuspend the pellet in 1x PBS or 1x TBS.
